# Supplementary material for: Flow Synthesis of Nature-Inspired Mitochondria-Targeted Phenolic Derivatives as Potential Neuroprotective Agents
Source: Antioxidants (Basel). 2022 Oct 31;11(11):2160. doi: 10.3390/antiox11112160 (PMC9686576; doi:10.3390/antiox11112160)

# Supporting information

## Flow synthesis of nature-inspired mitochondria-targeted phenolic derivatives as potential neuroprotective agents

Desirée Pecora,<sup>1</sup> Francesca Annunziata,<sup>1</sup> Sergio Pegurri,<sup>1</sup> Pasquale Picone,<sup>2</sup> Andrea

Pinto,<sup>3</sup> Domenico Nuzzo,<sup>2,\*</sup> Lucia Tamborini<sup>1,\*</sup>

<sup>1</sup>Department of Pharmaceutical Sciences, University of Milan, via Mangiagalli 25, 20133 Milan, Italy.

<sup>2</sup>Istituto per la Ricerca e l'Innovazione Biomedica (IRIB), CNR, Via Ugo La Malfa 153, 90146 Palermo, Italy.

<sup>3</sup>Department of Food, Environmental and Nutritional Sciences, University of Milan, via Celoria 2, 20133 Milan, Italy.

\*Correspondence: lucia.tamborini@unimi.it; Tel.: + 39 0250319367; domenico.nuzzo@irib.cnr.it; Tel: +39 0916809518

### Contents

|   |             |        |
|---|-------------|--------|
| - | Table S1    | page 2 |
| - | Figure S1   | page 3 |
| - | NMR spectra | page 4 |

**Table S1.** Overall yields obtained exploiting the two-step flow procedure reported in Paragraph 2.1

| <b>Compound</b> | <b>Yield (%)</b> |
|-----------------|------------------|
| <b>SP1</b>      | 37               |
| <b>SP2</b>      | 29               |
| <b>SP3</b>      | 49               |
| <b>SP4</b>      | 40               |
| <b>SP5</b>      | 50               |
| <b>SP6</b>      | 21               |
| <b>SP7</b>      | 18               |

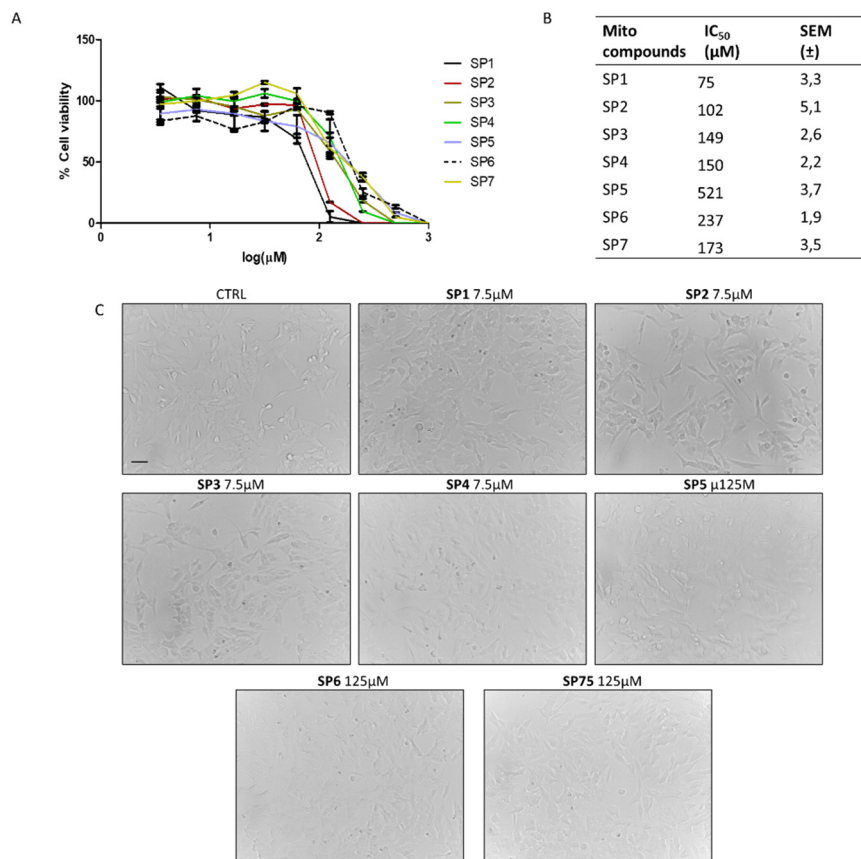

**Figure S1.** Effects of the MITO compounds **SP1-7** on cell viability and morphology of SH-SY5Y cells for 72 hours. A) MTS cell viability assay at 3.5, 7.5, 16.6, 31.5, 62.5, 125, 250, 500  $\mu\text{M}$  and 1 mM for 72 hours. B) IC<sub>50</sub> concentrations calculated in GraphPad Prisma 8.4.3 software, fraction of alive cells (%) is provided on vertical axis and log concentration ( $\mu\text{M}$ ) on horizontal axis. The IC<sub>50</sub> is the concentration at which the curve passes through the 50% inhibition level. C) Representative morphological images of untreated cells (CTRL) and cells treated with the MITO compounds.

# <sup>1</sup>H and <sup>13</sup>C NMR spectra of compounds SP1-7

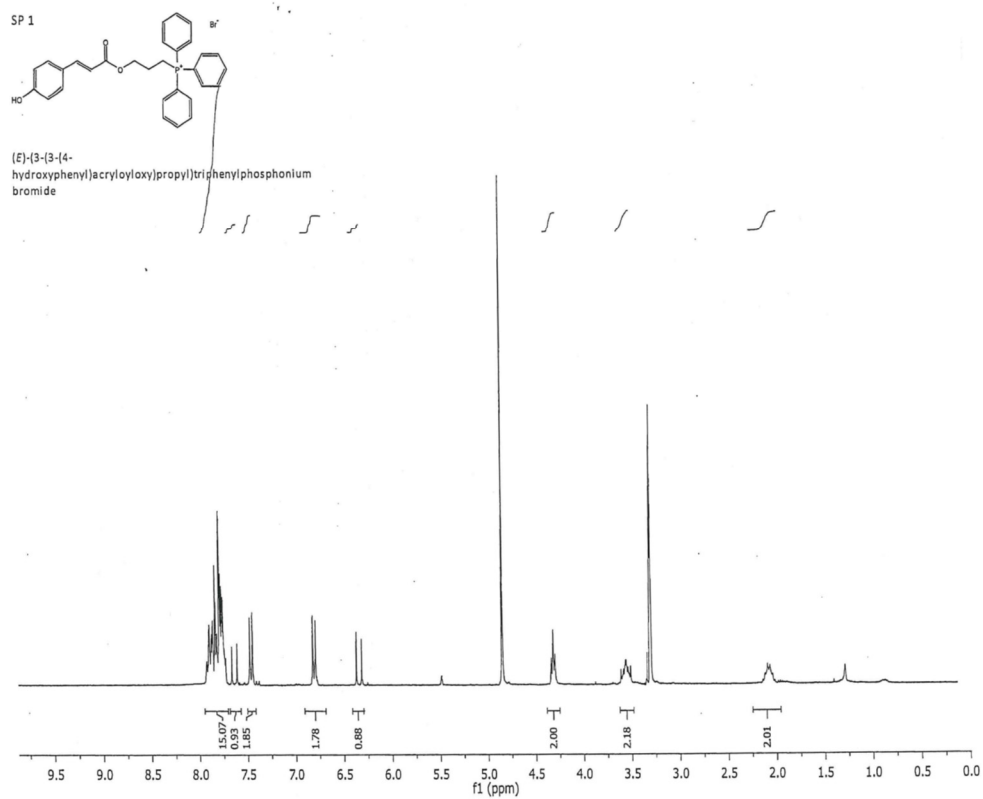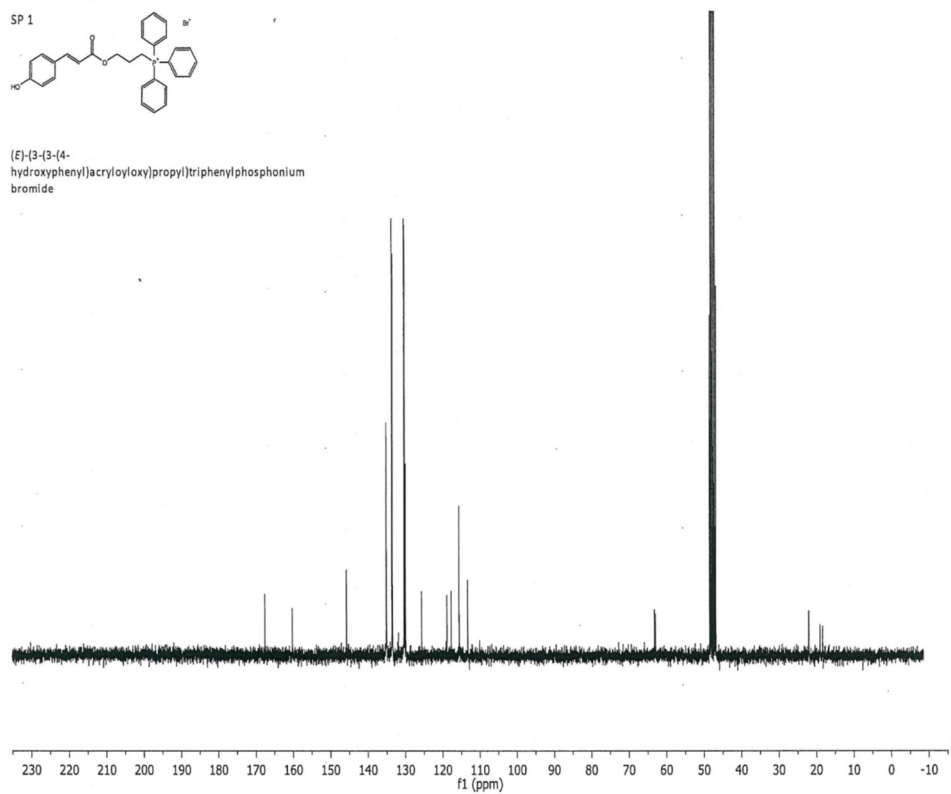

SP 2

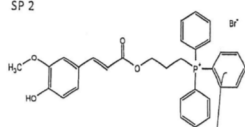

(E)-[3-[3-(4-hydroxy-3-methoxyphenyl)acryloyloxy]propyl]triphenylphosphonium bromide

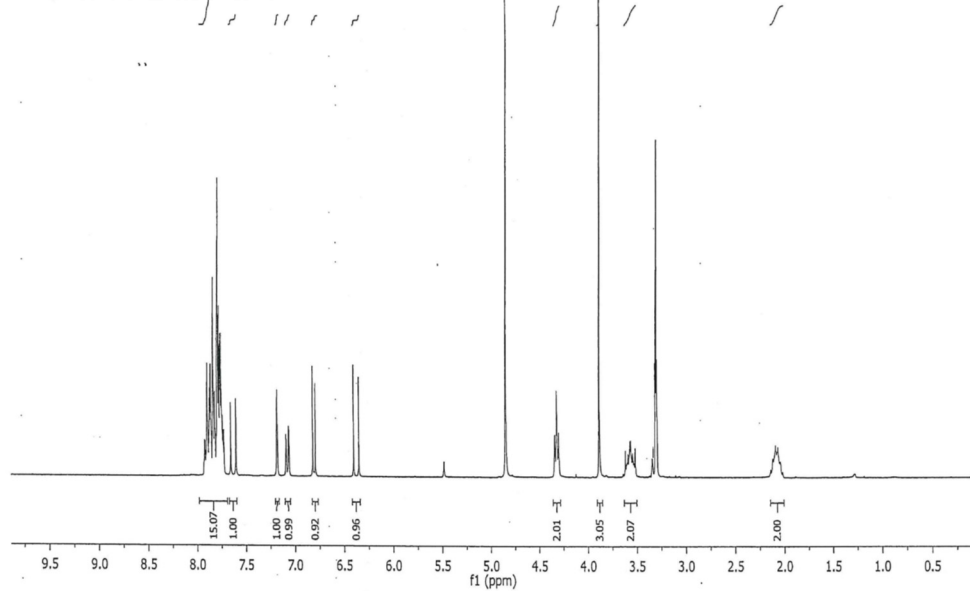

SP 2

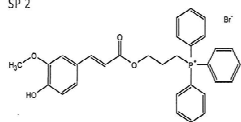

(E)-[3-[3-(4-hydroxy-3-methoxyphenyl)acryloyloxy]propyl]triphenylphosphonium bromide

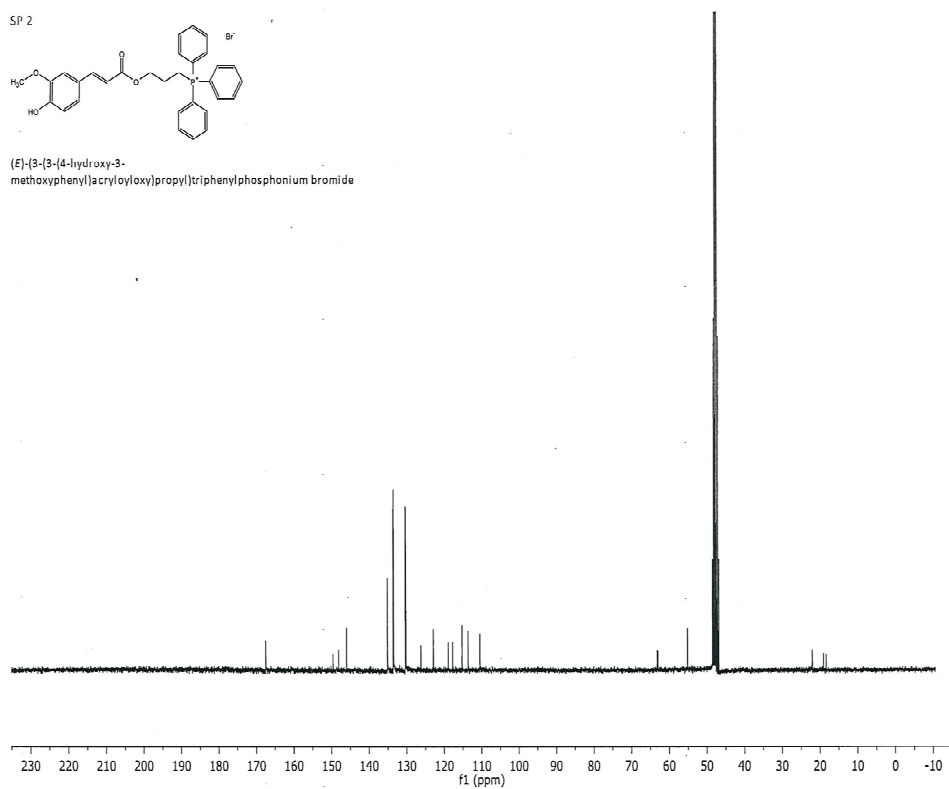

SP 3

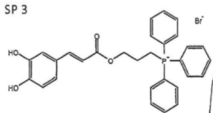

(E)-[3-(3,4-dihydroxyphenyl)acryloyloxy]propyltriphenylphosphonium bromide

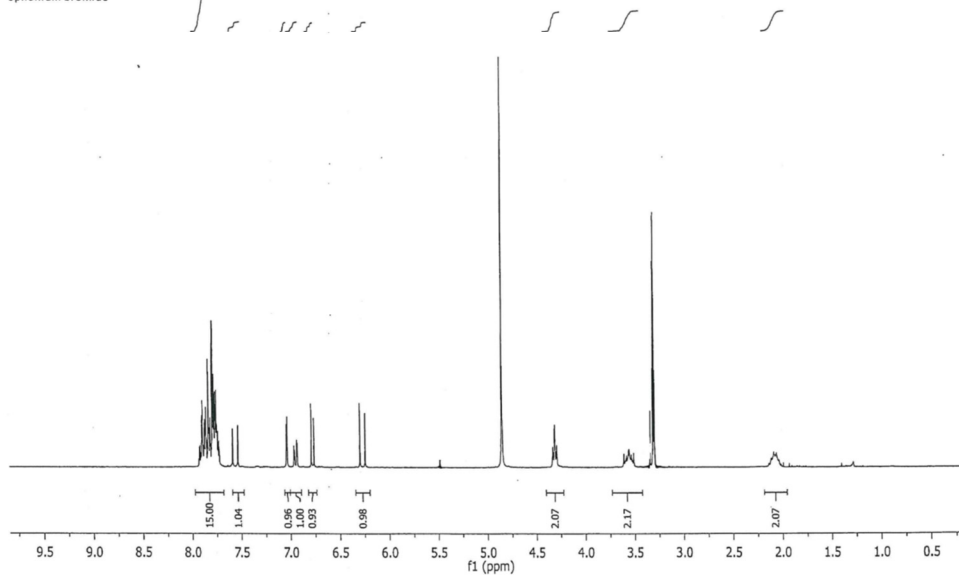

SP 3

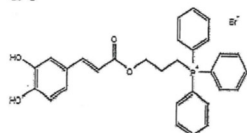

(E)-[3-(3,4-dihydroxyphenyl)acryloyloxy]propyltriphenylphosphonium bromide

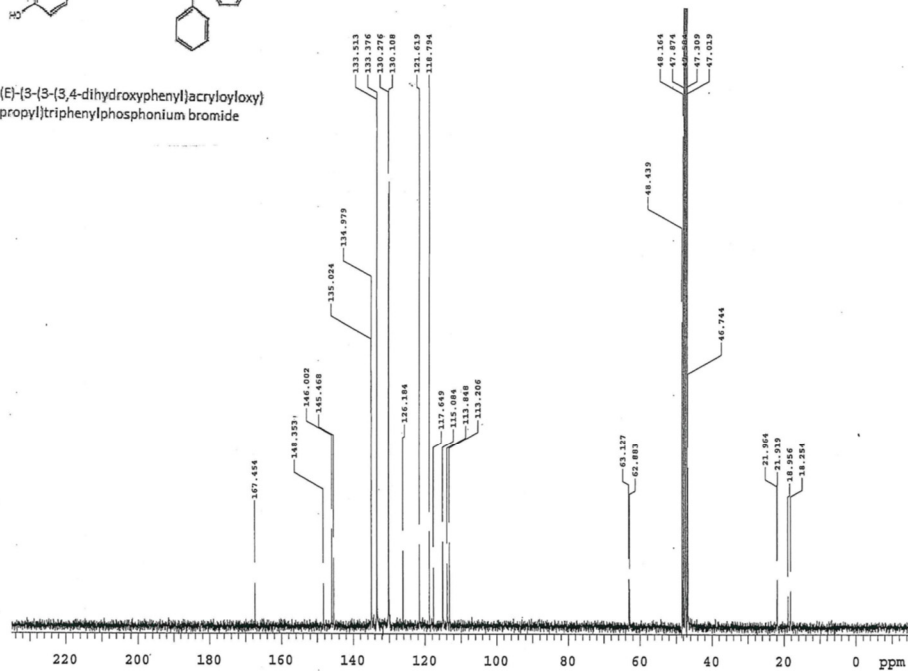

SP 4

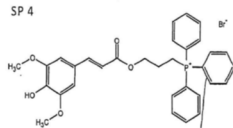

(E)-[3-[3-(4-hydroxy-3,5-dimethoxyphenyl)acryloyloxy]propyl]triphenylphosphonium bromide

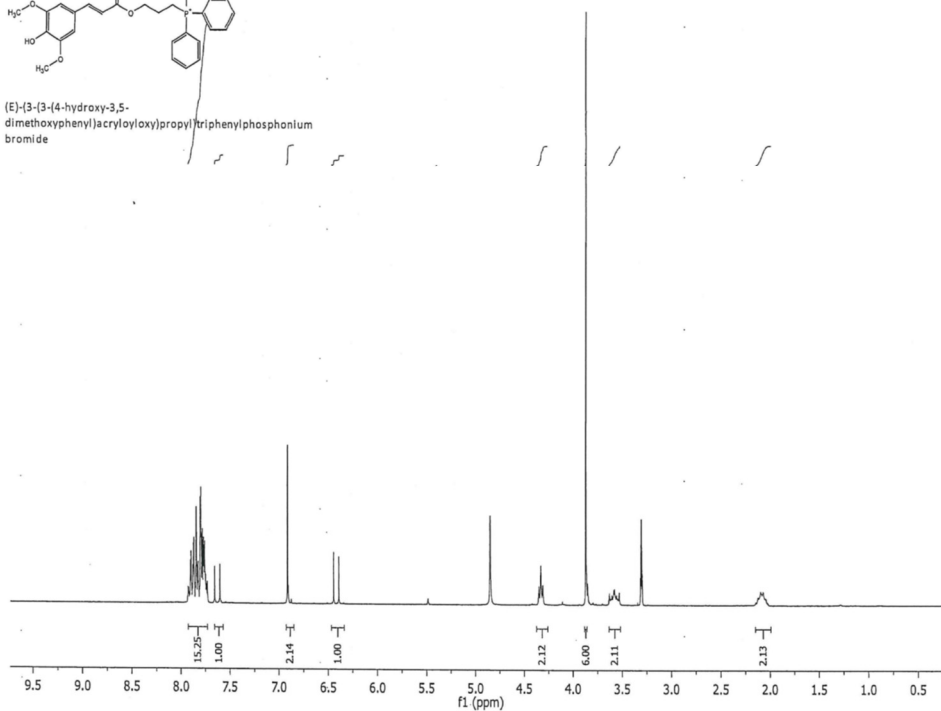

SP 4

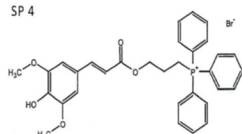

(E)-[3-[3-(4-hydroxy-3,5-dimethoxyphenyl)acryloyloxy]propyl]triphenylphosphonium bromide

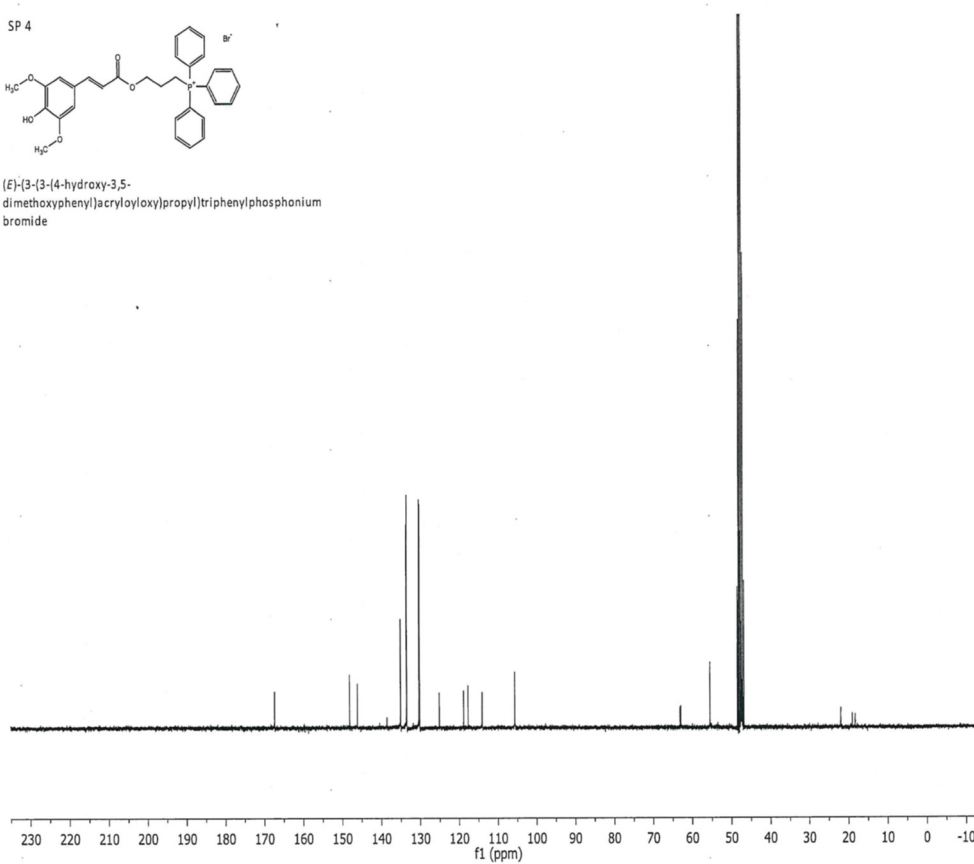

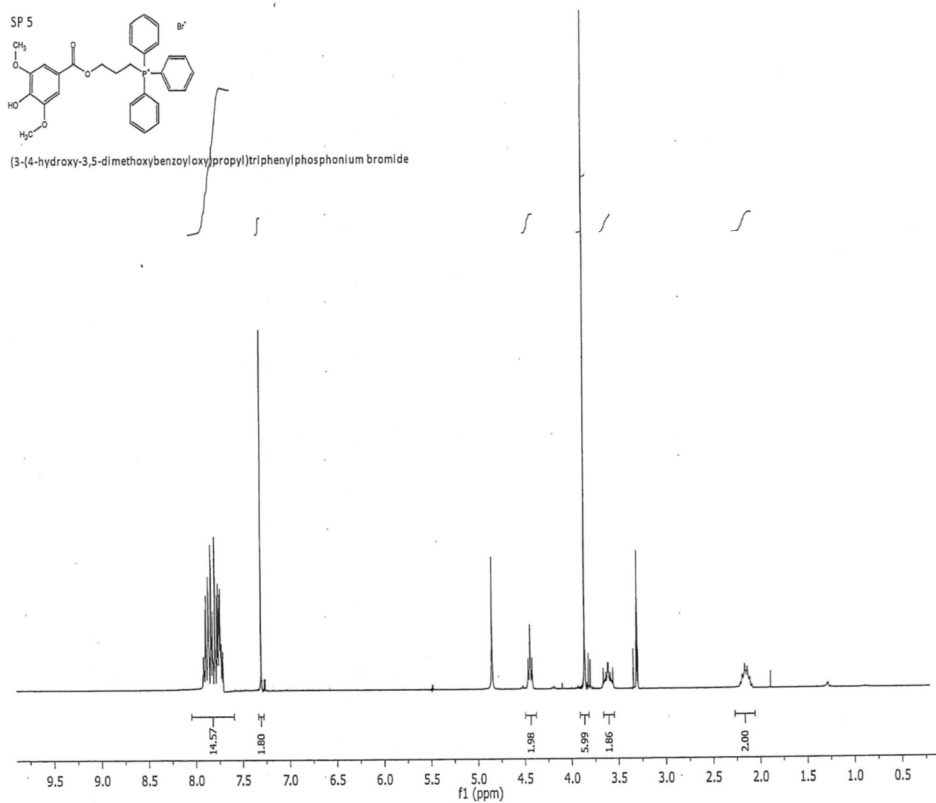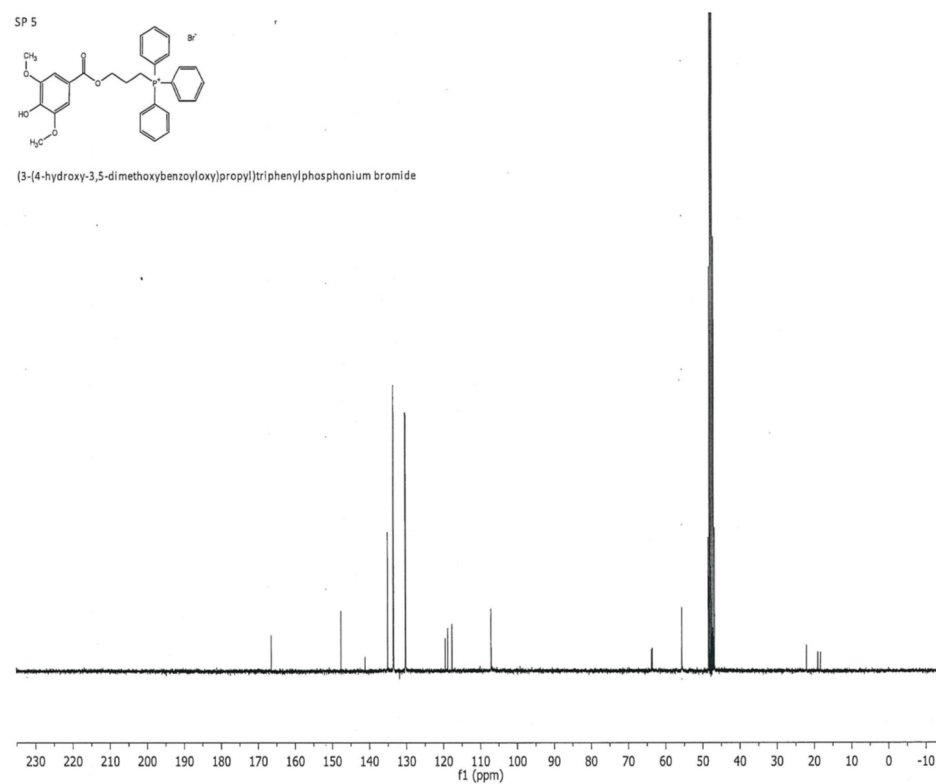

SP 6

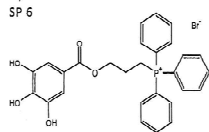

triphenyl(3-(3,4,5-trihydroxybenzoyloxy)propyl)phosphonium bromide

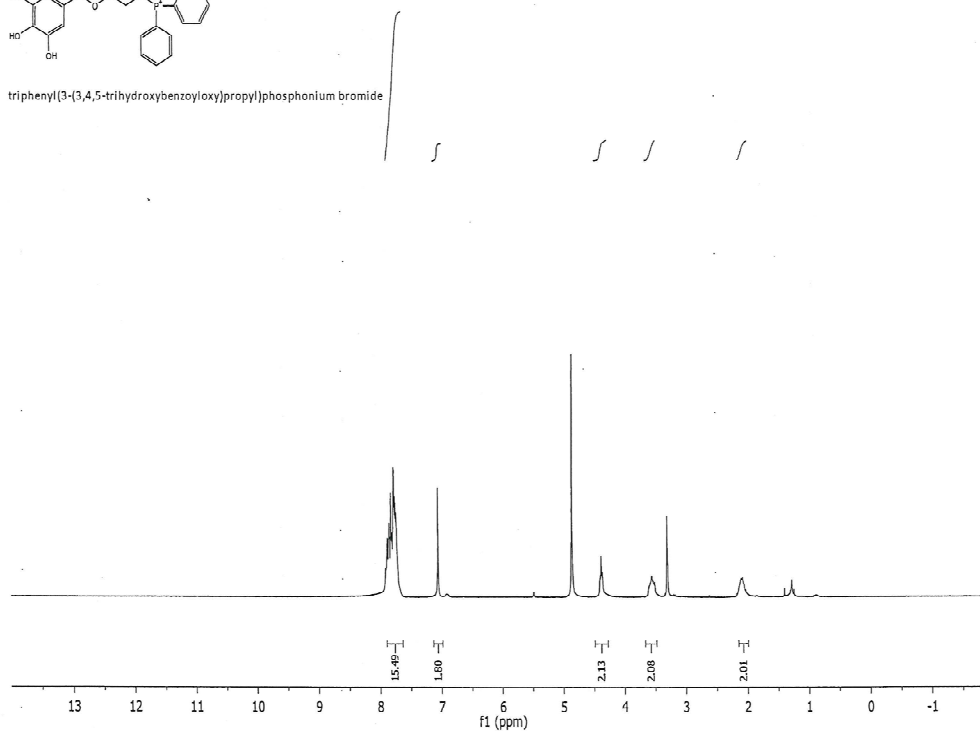

SP 6

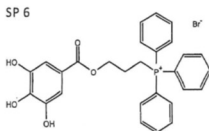

triphenyl(3-(3,4,5-trihydroxybenzoyloxy)propyl)phosphonium bromide

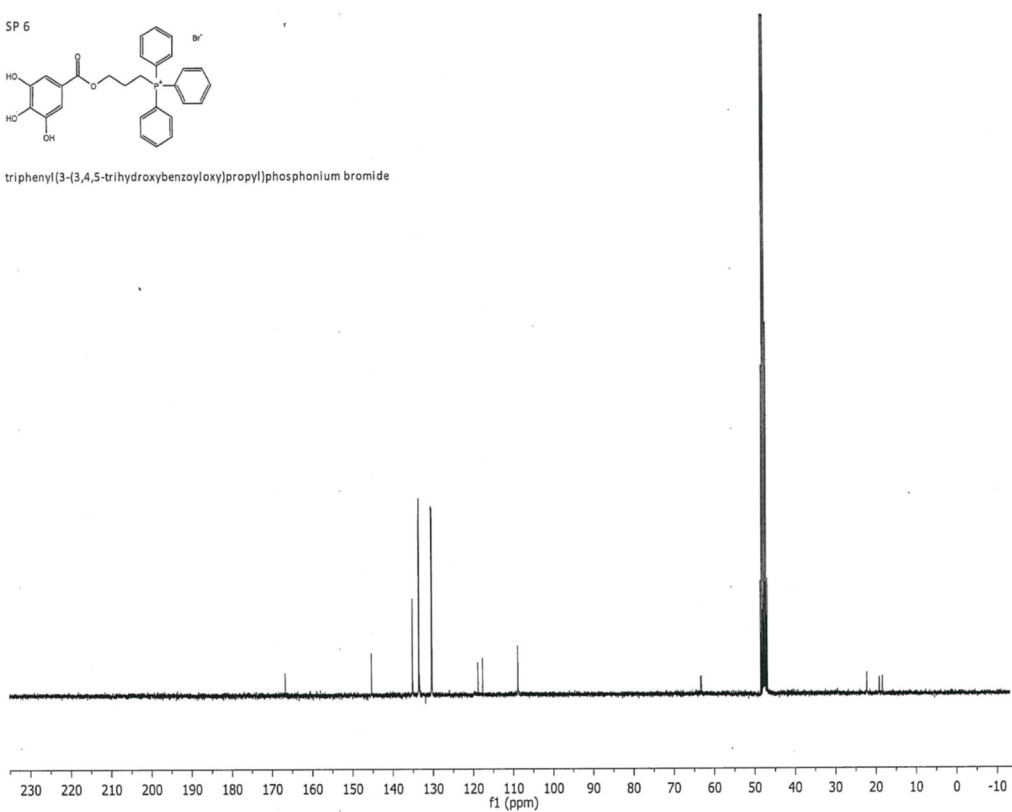

SP 7

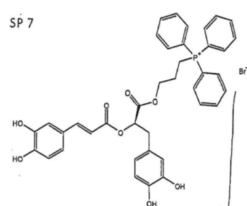

(R,E)-[3-{3-(3,4-dihydroxyphenyl)-2-{3-[3,4-dihydroxyphenyl]acryloyloxy}propanoyloxy}propyl]triphenylphosphonium bromide

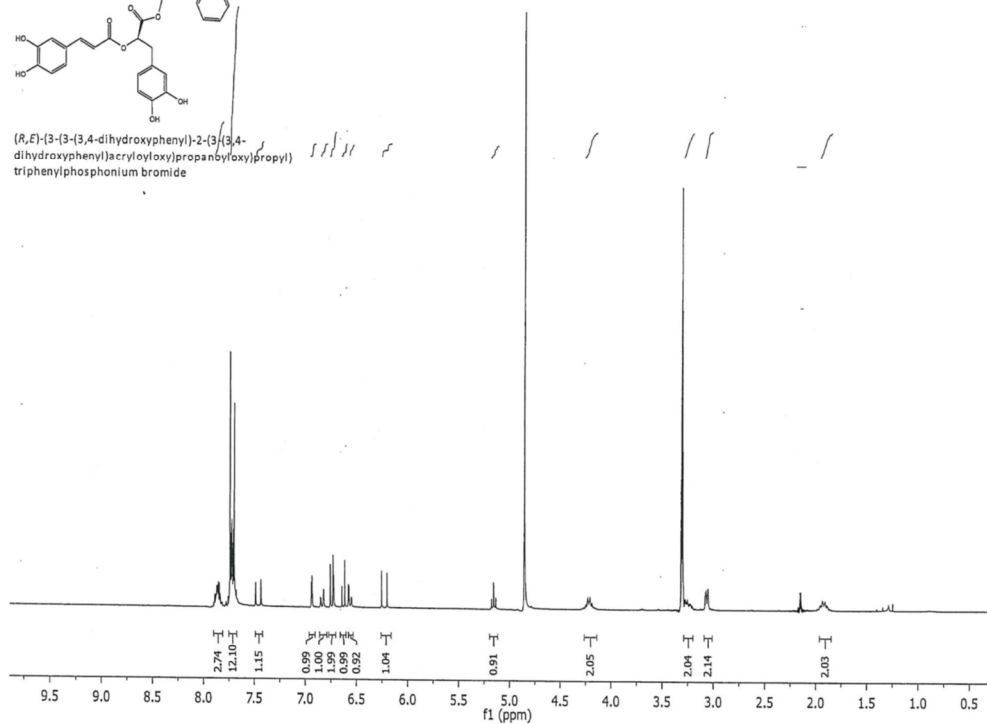

SP 7

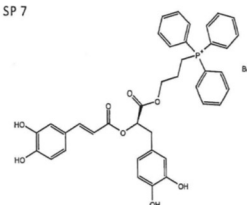

(R,E)-[3-{3-(3,4-dihydroxyphenyl)-2-{3-[3,4-dihydroxyphenyl]acryloyloxy}propanoyloxy}propyl]triphenylphosphonium bromide

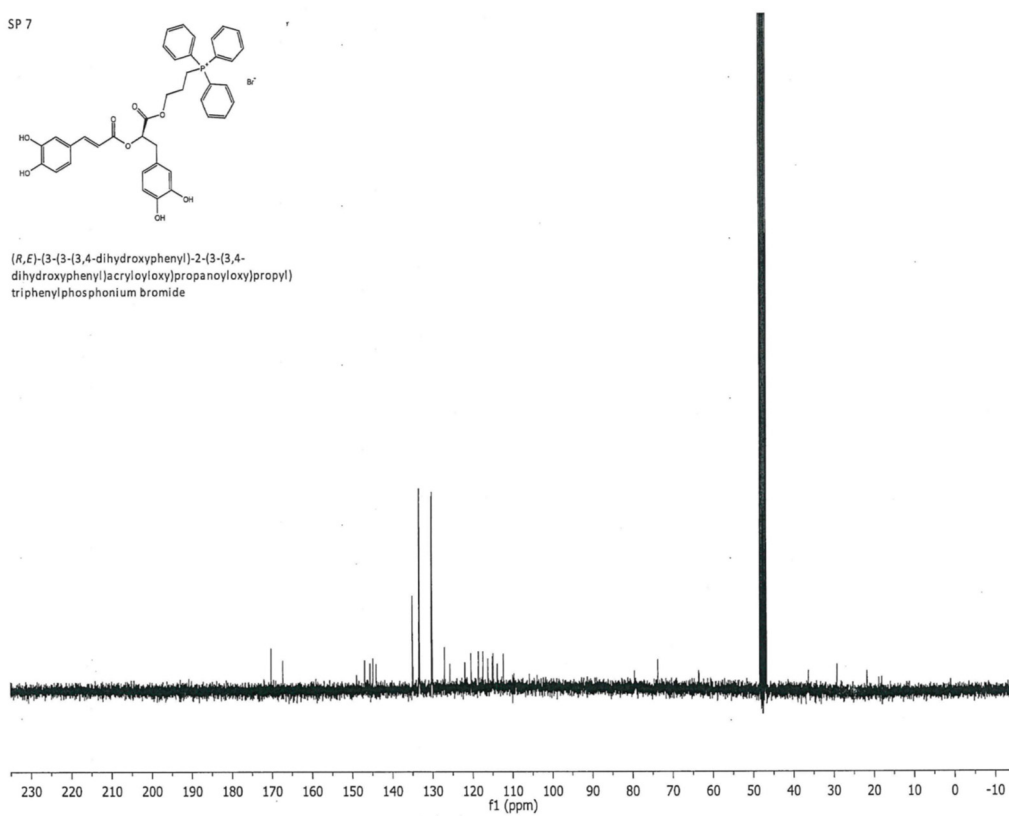

Supplement: Supplementary file 1 [file antioxidants-11-02160-s001.zip › antioxidants-1938831-supplementary.pdf]
